# Supplementary material for: 遠赤外線鰹節焼軟機 (特集 食品製造業におけるエレクトロヒートシステム)
Source: Royal Society of Chemistry journal article supplement (doi:10.1039/d2dt00820c), 2010-01-01
Supplement: d2dt00820c1.pdf [file d2dt00820c1.pdf]

Supporting Information for

A novel all-nitrogen molecular crystal N<sub>16</sub> as promising high-energy density material

Lei Zhao<sup>1,2†</sup>, Shijie Liu<sup>3,4†</sup>, Yuanzheng Chen<sup>5</sup>, Wencai Yi<sup>6</sup>, Darlar Khodagholian<sup>2</sup>,  
Fenglong Gu<sup>7</sup>, Eric Kelson<sup>2</sup>, Yonghao Zheng<sup>8\*</sup>, Bingbing Liu<sup>4\*</sup>, Mao-sheng Miao<sup>2,9\*</sup>

<sup>1</sup> College of Chemistry and Chemical Engineering, Southwest Petroleum University, Chengdu 610500, P. R. China

<sup>2</sup> Department of Chemistry & Biochemistry, California State University Northridge, Northridge, CA, 91330, United States

<sup>3</sup> School of Physics and Engineering, and Henan Key Laboratory of Photoelectric Energy Storage Materials and Applications, Henan University of Science and Technology, Luoyang 471003, P. R. China

<sup>4</sup> State Key Laboratory of Superhard Materials, Jilin University, Changchun 130012, P. R. China

<sup>5</sup> School of Physical Science and Technology, Key Laboratory of Advanced Technologies of Materials, Ministry of Education of China, Southwest Jiaotong University, Chengdu 610031, P. R. China

<sup>6</sup> School of Physics and Physical Engineering, Qufu Normal University, Qufu, 273165, P. R. China

<sup>7</sup> Key Laboratory of Theoretical Chemistry of Environment, Ministry of Education, School of Chemistry and Environment, South China Normal University, Guangzhou 510006, P. R. China

<sup>8</sup> School of Optoelectronic Science and Engineering, University of Electronic Science and Technology of China (UESTC), Chengdu 610054, P. R. China

<sup>9</sup> Beijing Computational Science Research Center, Beijing, 100193, P. R. China

\*Corresponding author: [mmiao@csun.edu](mailto:mmiao@csun.edu); [liubb@jlu.edu.cn](mailto:liubb@jlu.edu.cn);  
[zhengyonghao@uestc.edu.cn](mailto:zhengyonghao@uestc.edu.cn)

**Table S1.** Harmonic vibrational analysis of N<sub>16</sub> molecule.

| Mode | Frequency | Infrared | Mode | Frequency | Infrared |
|------|-----------|----------|------|-----------|----------|
| 1    | 41.68     | 0.0001   | 22   | 834.35    | 0.1864   |
| 2    | 57.49     | 1.3169   | 23   | 916.95    | 27.6215  |
| 3    | 57.68     | 1.3276   | 24   | 917.14    | 27.5905  |
| 4    | 74.12     | 0.2877   | 25   | 1041.28   | 1.4787   |
| 5    | 74.26     | 0.2769   | 26   | 1041.46   | 1.5181   |
| 6    | 91.12     | 1.8537   | 27   | 1045.05   | 1.2268   |
| 7    | 187.03    | 0.0000   | 28   | 1071.04   | 42.2564  |
| 8    | 326.10    | 0.3131   | 29   | 1071.21   | 42.1406  |
| 9    | 326.15    | 0.3138   | 30   | 1084.04   | 0.1509   |
| 10   | 363.01    | 0.1206   | 31   | 1125.69   | 0.1101   |
| 11   | 401.83    | 3.7782   | 32   | 1125.89   | 0.1087   |
| 12   | 401.90    | 3.7920   | 33   | 1131.49   | 6.3023   |
| 13   | 601.83    | 4.0438   | 34   | 1250.76   | 16.4274  |
| 14   | 649.19    | 0.0000   | 35   | 1251.03   | 16.4709  |
| 15   | 678.41    | 3.4005   | 36   | 1275.72   | 0.0193   |
| 16   | 678.43    | 3.4278   | 37   | 1389.00   | 0.5344   |
| 17   | 750.04    | 0.7745   | 38   | 1407.93   | 0.6561   |
| 18   | 750.08    | 0.7843   | 39   | 1408.29   | 0.6637   |
| 19   | 752.33    | 0.0000   | 40   | 1458.46   | 1.9723   |
| 20   | 800.03    | 66.7973  | 41   | 1458.66   | 1.9936   |
| 21   | 800.44    | 66.8810  | 42   | 1462.31   | 16.1381  |

**Table S2.** Geometries of NH<sub>3</sub> and N<sub>16</sub> in gas phase and N<sub>16</sub> in solid state.

|                 |                                                                                     | Bond (Å)  | Angle (°)   | Dihedral (°) |
|-----------------|-------------------------------------------------------------------------------------|-----------|-------------|--------------|
| NH <sub>3</sub> | 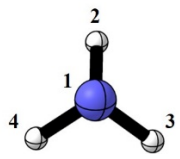 | B12 1.019 | A213 105.76 | D2431 40.29  |
| Gas Phase       |                                                                                     | B13 1.019 | A314 105.76 |              |
|                 |                                                                                     | B14 1.019 | A412 105.76 |              |

|             |  |           |             |             |
|-------------|--|-----------|-------------|-------------|
| $N_{16}$    |  | B12 1.375 | A213 115.27 | D2431 24.35 |
| Gas Phase   |  | B13 1.375 | A314 115.28 |             |
|             |  | B14 1.375 | A412 115.27 |             |
| $N_{16}$    |  | B12 1.380 | A213 114.69 | D2431 25.75 |
| Solid State |  | B13 1.378 | A314 114.65 |             |
|             |  | B14 1.378 | A412 114.69 |             |

**Table S3.** Structural parameters including the space groups, lattice constants, and atomic positions for predicted  $N_{16}$  and  $N_8$  cubic crystals. Previous reported crystalline  $N_8$  molecule is also listed for comparison.

|                           | Space group | Lattice parameters | Wyckoff positions |         |         |         |
|---------------------------|-------------|--------------------|-------------------|---------|---------|---------|
| $N_{16}^a$                | Cm          | a = 6.79045 Å      | 4b                | 0.13958 | 0.87311 | 0.29248 |
|                           |             | b = 11.95041 Å     | 4b                | 0.22408 | 0.77699 | 0.29251 |
|                           |             | c = 5.21160 Å      | 4b                | 0.20641 | 0.74759 | 0.02699 |
|                           |             | $\beta$ = 108.1848 | 4b                | 0.11188 | 0.82580 | 0.86536 |
|                           |             |                    | 4b                | 0.07242 | 0.90326 | 0.02966 |
|                           |             |                    | 2a                | 0.96365 | 0.00000 | 0.93150 |
|                           |             |                    | 2a                | 0.76449 | 0.00000 | 0.94936 |
|                           |             |                    | 2a                | 0.59795 | 0.00000 | 0.72697 |
|                           | 2a          | 0.44305            | 0.00000           | 0.81987 |         |         |
|                           | 2a          | 0.51551            | 0.00000           | 0.09995 |         |         |
|                           | 2a          | 0.71547            | 0.00000           | 0.18015 |         |         |
| $N_8$ -cubic <sup>a</sup> | R-3         | a = 6.55631 Å      | 18f               | 0.00391 | 0.19270 | 0.43283 |
|                           |             | c = 6.61140 Å      | 6c                | 0.00000 | 0.00000 | 0.29792 |
| $N_8^b$                   | P1          | a = 10.68587 Å     | 1a                | 0.76023 | 0.18969 | 0.00696 |
|                           |             | b = 4.48237 Å      | 1a                | 0.64516 | 0.17816 | 0.03418 |
|                           |             | c = 6.75541 Å      | 1a                | 0.56465 | 0.27353 | 0.86156 |

|                    |    |         |         |         |
|--------------------|----|---------|---------|---------|
| $\alpha = 90.9501$ | 1a | 0.86600 | 0.19162 | 0.01120 |
| $\beta = 83.3467$  | 1a | 0.00853 | 0.83059 | 0.47863 |
| $\gamma = 45.6150$ | 1a | 0.11972 | 0.71651 | 0.61687 |
|                    | 1a | 0.81238 | 0.86403 | 0.39450 |
|                    | 1a | 0.91869 | 0.75063 | 0.53785 |
|                    | 1a | 0.40343 | 0.20654 | 0.06804 |
|                    | 1a | 0.28267 | 0.21933 | 0.06239 |
|                    | 1a | 0.31823 | 0.79038 | 0.51711 |
|                    | 1a | 0.21811 | 0.76835 | 0.55340 |
|                    | 1a | 0.71261 | 0.80945 | 0.43763 |
|                    | 1a | 0.61123 | 0.78967 | 0.44381 |
|                    | 1a | 0.44330 | 0.28690 | 0.87645 |
|                    | 1a | 0.17529 | 0.21887 | 0.07765 |

<sup>a</sup> predicted in this work.

<sup>b</sup> from reference<sup>1</sup>.

**Table S4.** Formation energy of  $N_{16}$  in the gas phase and solid state.

|             | $N_2$ (a.u.)            | $N_{16}$ (a.u.) | Formation Energy(eV) |
|-------------|-------------------------|-----------------|----------------------|
| Gas Phase   | -109.519                | -875.517        | 17.178               |
| Solid State | $\epsilon$ - $N_2$ (eV) | $N_{16}$ (eV)   |                      |
| 0 GPa       | -374.020                | -111.874        | 12.799               |
| 20 GPa      | -299.139                | -92.659         | 7.054                |
| 40 GPa      | -243.291                | -77.344         | 3.753                |
| 60 GPa      | -194.838                | -63.597         | 1.349                |
| 80 GPa      | -150.943                | -50.852         | -0.537               |
| 100 GPa     | -110.329                | -38.836         | -2.059               |

We carefully analyzed the symmetry of  $N_{16}$  molecular crystal and found that it can be assigned to either the  $Cm$  or  $P1$  symmetry group (see the figure S1 below) depending on the symmetry operation criteria parameter. However, the structural relaxation enthalpies from imposing either symmetry group result in practically the same results. We therefore assigned the higher symmetry of  $Cm$  to this structure. Majority solid-state compounds show much higher symmetry. However, this trend can be interrupted in molecular crystals, especially for those consisting of large molecules. The  $Cm$  structure may seem to have higher symmetry as both the molecule and the lattice are highly ordered. However, the combination of the large molecule and the translational symmetry of the lattice impose a large constraint on the overall symmetry. Considering the unit cell contains only two  $N_{16}$  molecules, the translational symmetry of this molecular crystal is quite “high”.

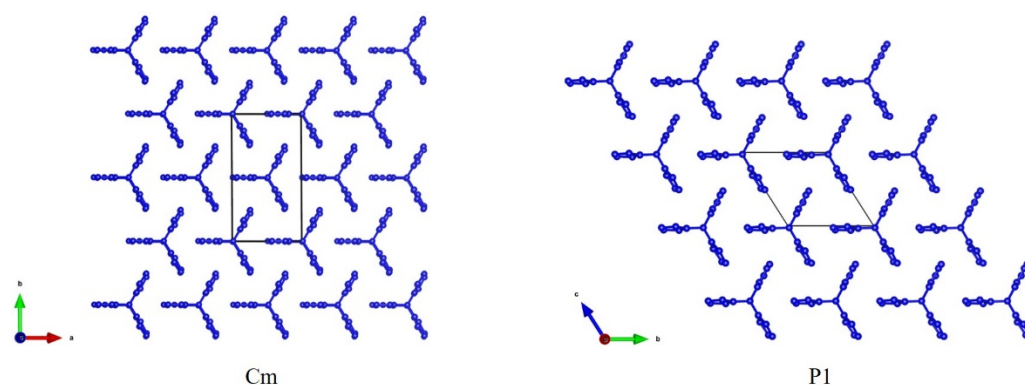

**Figure S1.** Structures of  $N_{16}$  molecular crystal with  $Cm$  and  $P1$  symmetry.

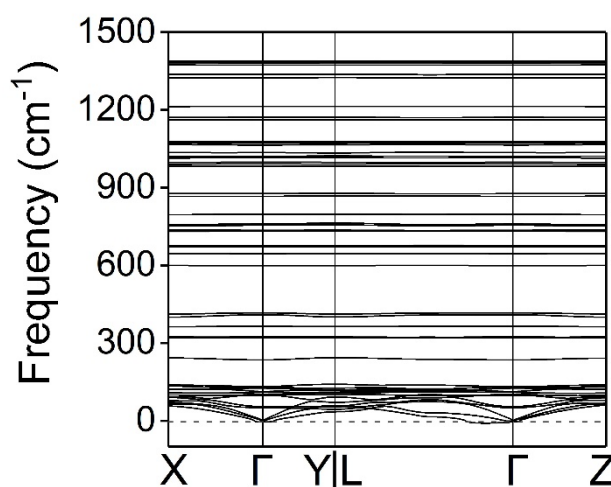

**Figure S2.** The phonon spectra of  $N_{16}$  solid structure.

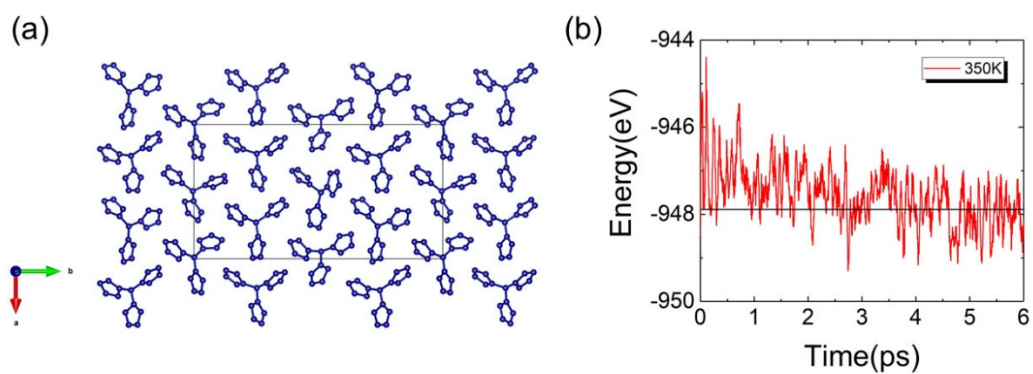

**Figure S3.** (a) Snapshots of the final configurations and (b) energy change for molecular dynamic simulation at 350K.

## Reference

- 1 Hirshberg, B., Gerber, R. B. & Krylov, A. I. Calculations predict a stable molecular crystal of  $N_8$ . *Nat Chem* **6**, 52 (2014).
